# Supplementary material for: 2,4,6-Trinitrotoluene Induces Apoptosis via ROS-Regulated Mitochondrial Dysfunction and Endoplasmic Reticulum Stress in HepG2 and Hep3B Cells
Source: PubMed Central journal article supplement (PMC5557873; doi:10.1038/s41598-017-08308-z), 2017-08-15
Supplement: 41598_2017_8308_MOESM1_ESM.pdf [file 41598_2017_8308_MOESM1_ESM.pdf]

## 2,4,6-Trinitrotoluene Induces Apoptosis via ROS-Regulated Mitochondrial Dysfunction and Endoplasmic Reticulum Stress in HepG2 and Hep3B Cells

Hung-Yu Liao, Chih-Ming Kao, Chao-Ling Yao, Po-Wei Chiu, Chun-Chen Yao, and Ssu-Ching Chen

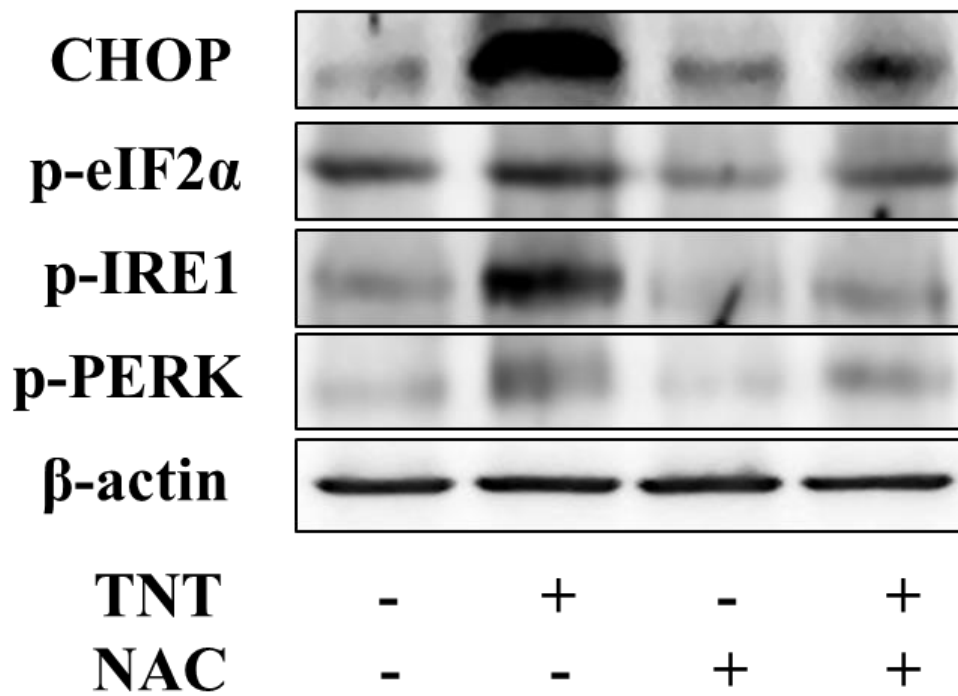

**Supplemental Figure 1.** ROS-dependent ER stress was involved in the TNT-mediated ROS production. (A) Hep3B cells were treated with 60  $\mu$ M TNT for 24 h in the presence or absence of 10 mM NAC, given the expression of ER stress-related proteins. The bands were excised from different gels that were run under the same electrophoresis condition.

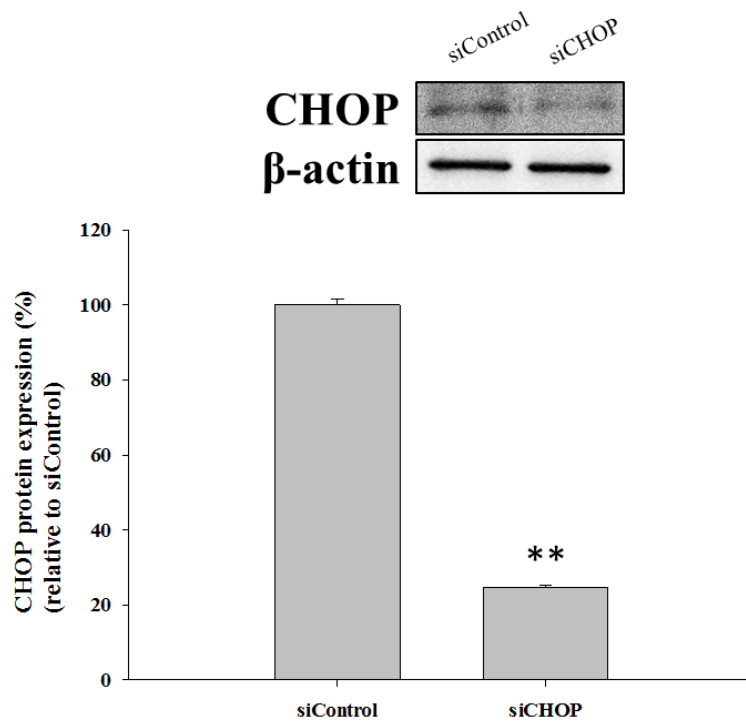

**Supplemental Figure 2.** HepG2 cells were transfected with CHOP siRNA for 24h, and analysed by western blot; n = 3. The data were presented as mean  $\pm$  SD. The differences were significant at \*P < 0.05, \*\*P < 0.01.

**Supplemental Table 3.** Comparison of RNA-seq results by quantitative PCR on differentially expressed genes

| Gene                                 | Fold change (log2 ) |          |
|--------------------------------------|---------------------|----------|
|                                      | RNA-seq             | q-PCR    |
| <i>GADD34</i><br>( <i>PPP1R15A</i> ) | 4.14                | 12±0.12  |
| <i>ATF3</i>                          | 1.72                | 6±0.6    |
| <i>BIP</i><br>( <i>HspA5</i> )       | 5.6                 | 1.4±0.2  |
| <i>HERP</i><br>( <i>HERPUD1</i> )    | 0.5                 | 2.1±0.8  |
| <i>EDEMI</i>                         | 3.2                 | 2.3±0.3  |
| <i>CHOP</i><br>( <i>DDIT3</i> )      | 2.2                 | 4.6±0.8  |
| <i>ASNS</i>                          | 1                   | 1.7±0.2  |
| <i>IGFBP</i>                         | 4.4                 | 2.2±0.2  |
| <i>CYP1A1</i>                        | 5.8                 | 4±0.6    |
| <i>ATP6V0A1</i>                      | 1.9                 | 1.2±0.4  |
| <i>NDUFA1</i>                        | -6                  | -4.2±0.6 |
| <i>SDHD</i>                          | -1                  | -1.3±0.3 |
| <i>COX6C</i>                         | -2.6                | -2.4±0.4 |
| <i>GRP94</i><br>( <i>HSP90B1</i> )   | 3                   | 2±0.3    |

The values represent the mean ± SD and were derived from at least three independent experiments. Triplicate measurements were performed for each experiment. All the data

$P < 0.05$ .

**Supplemental Table 4.**

| #  | Pathway                                                      | DEGs with pathway annotation (1309) | All genes with pathway annotation (17252) | Pvalue       | Qvalue       |
|----|--------------------------------------------------------------|-------------------------------------|-------------------------------------------|--------------|--------------|
| 1  | <a href="#">Oxidative phosphorylation</a>                    | 30 (2.29%)                          | 148 (0.86%)                               | 5.88379e-07  | 0.0001441529 |
| 2  | <a href="#">Alzheimer's disease</a>                          | 39 (2.98%)                          | 234 (1.36%)                               | 2.565723e-06 | 0.0003143011 |
| 3  | <a href="#">Ribosome</a>                                     | 27 (2.06%)                          | 147 (0.85%)                               | 1.460253e-05 | 0.0011925399 |
| 4  | <a href="#">Parkinson's disease</a>                          | 29 (2.22%)                          | 167 (0.97%)                               | 2.174453e-05 | 0.0013318525 |
| 5  | <a href="#">Huntington's disease</a>                         | 39 (2.98%)                          | 265 (1.54%)                               | 4.964504e-05 | 0.0024326070 |
| 6  | <a href="#">Metabolism of xenobiotics by cytochrome P450</a> | 17 (1.3%)                           | 101 (0.59%)                               | 0.001484609  | 0.0606215342 |
| 7  | <a href="#">Complement and coagulation cascades</a>          | 25 (1.91%)                          | 181 (1.05%)                               | 0.002573143  | 0.0839549095 |
| 8  | <a href="#">Phosphatidylinositol signaling system</a>        | 22 (1.68%)                          | 155 (0.9%)                                | 0.003223227  | 0.0839549095 |
| 9  | <a href="#">Glycerolipid metabolism</a>                      | 15 (1.15%)                          | 91 (0.53%)                                | 0.003380644  | 0.0839549095 |
| 10 | <a href="#">Metabolic pathways</a>                           | 252 (19.25%)                        | 2847 (16.5%)                              | 0.003426731  | 0.0839549095 |
| 11 | <a href="#">Dorso-ventral axis formation</a>                 | 12 (0.92%)                          | 67 (0.39%)                                | 0.004193373  | 0.0933978532 |
| 12 | <a href="#">Ubiquitin mediated proteolysis</a>               | 28 (2.14%)                          | 230 (1.33%)                               | 0.008825692  | 0.1801912117 |
| 13 | <a href="#">Pyrimidine metabolism</a>                        | 19 (1.45%)                          | 144 (0.83%)                               | 0.01268108   | 0.2389895846 |
| 14 | <a href="#">Steroid hormone biosynthesis</a>                 | 11 (0.84%)                          | 69 (0.4%)                                 | 0.01427793   | 0.2498637750 |
| 15 | <a href="#">Maturity onset diabetes of the young</a>         | 6 (0.46%)                           | 29 (0.17%)                                | 0.01975013   | 0.2879070950 |

|    |                                                          |            |             |            |              |
|----|----------------------------------------------------------|------------|-------------|------------|--------------|
| 16 | <a href="#">Lysine degradation</a>                       | 14 (1.07%) | 102 (0.59%) | 0.02176809 | 0.2879070950 |
| 17 | <a href="#">Adherens junction</a>                        | 21 (1.6%)  | 173 (1%)    | 0.02186023 | 0.2879070950 |
| 18 | <a href="#">Regulation of actin cytoskeleton</a>         | 58 (4.43%) | 586 (3.4%)  | 0.02225297 | 0.2879070950 |
| 19 | <a href="#">Citrate cycle (TCA cycle)</a>                | 7 (0.53%)  | 38 (0.22%)  | 0.02251832 | 0.2879070950 |
| 20 | <a href="#">Glycerophospholipid metabolism</a>           | 17 (1.3%)  | 133 (0.77%) | 0.02350262 | 0.2879070950 |
| 21 | <a href="#">Selenocompound metabolism</a>                | 5 (0.38%)  | 23 (0.13%)  | 0.02658661 | 0.2932811292 |
| 22 | <a href="#">Ascorbate and aldarate metabolism</a>        | 6 (0.46%)  | 31 (0.18%)  | 0.02691747 | 0.2932811292 |
| 23 | <a href="#">Fat digestion and absorption</a>             | 11 (0.84%) | 76 (0.44%)  | 0.02775248 | 0.2932811292 |
| 24 | <a href="#">Lipoic acid metabolism</a>                   | 4 (0.31%)  | 16 (0.09%)  | 0.02872958 | 0.2932811292 |
| 25 | <a href="#">Drug metabolism - cytochrome P450</a>        | 12 (0.92%) | 89 (0.52%)  | 0.03620829 | 0.3548412420 |
| 26 | <a href="#">Inositol phosphate metabolism</a>            | 13 (0.99%) | 101 (0.59%) | 0.04172799 | 0.3792422148 |
| 27 | <a href="#">Glycolysis / Gluconeogenesis</a>             | 11 (0.84%) | 81 (0.47%)  | 0.04179404 | 0.3792422148 |
| 28 | <a href="#">Glyoxylate and dicarboxylate metabolism</a>  | 6 (0.46%)  | 35 (0.2%)   | 0.04595226 | 0.4020822750 |
| 29 | <a href="#">Pentose and glucuronate interconversions</a> | 8 (0.61%)  | 54 (0.31%)  | 0.04961353 | 0.4191487879 |

**Supplemental Table 5.** Differential Pathway detected in TNT (80  $\mu$ M)

| # | Pathway                              | DEGs with pathway annotation (4865) | All genes with pathway annotation (17252) | Pvalue       | Qvalue       |
|---|--------------------------------------|-------------------------------------|-------------------------------------------|--------------|--------------|
| 1 | <a href="#">Alzheimer's disease</a>  | 107 (2.2%)                          | 234 (1.36%)                               | 7.073067e-09 | 1.803632e-06 |
| 2 | <a href="#">Huntington's disease</a> | 112 (2.3%)                          | 265 (1.54%)                               | 5.406575e-07 | 6.893383e-05 |

|    |                                                             |              |              |              |              |
|----|-------------------------------------------------------------|--------------|--------------|--------------|--------------|
| 3  | <a href="#">Ribosome biogenesis in eukaryotes</a>           | 59 (1.21%)   | 124 (0.72%)  | 3.387542e-06 | 2.879411e-04 |
| 4  | <a href="#">Oxidative phosphorylation</a>                   | 67 (1.38%)   | 148 (0.86%)  | 6.618594e-06 | 4.219354e-04 |
| 5  | <a href="#">Insulin signaling pathway</a>                   | 96 (1.97%)   | 235 (1.36%)  | 1.835939e-05 | 9.363289e-04 |
| 6  | <a href="#">Ribosome</a>                                    | 64 (1.32%)   | 147 (0.85%)  | 4.695647e-05 | 1.995650e-03 |
| 7  | <a href="#">Parkinson's disease</a>                         | 70 (1.44%)   | 167 (0.97%)  | 9.233666e-05 | 3.363693e-03 |
| 8  | <a href="#">Ubiquitin mediated proteolysis</a>              | 91 (1.87%)   | 230 (1.33%)  | 0.0001208199 | 3.851134e-03 |
| 9  | <a href="#">Phosphatidylinositol signaling system</a>       | 65 (1.34%)   | 155 (0.9%)   | 0.0001587002 | 4.496506e-03 |
| 10 | <a href="#">Metabolic pathways</a>                          | 880 (18.09%) | 2847 (16.5%) | 0.0002596131 | 6.620134e-03 |
| 11 | <a href="#">Inositol phosphate metabolism</a>               | 45 (0.92%)   | 101 (0.59%)  | 0.0003176133 | 7.362854e-03 |
| 12 | <a href="#">Protein processing in endoplasmic reticulum</a> | 92 (1.89%)   | 246 (1.43%)  | 0.001026296  | 2.130086e-02 |
| 13 | <a href="#">Non-small cell lung cancer</a>                  | 38 (0.78%)   | 86 (0.5%)    | 0.001085926  | 2.130086e-02 |
| 14 | <a href="#">Endocytosis</a>                                 | 144 (2.96%)  | 413 (2.39%)  | 0.001645516  | 2.997190e-02 |
| 15 | <a href="#">Cell cycle</a>                                  | 70 (1.44%)   | 183 (1.06%)  | 0.001983976  | 3.372759e-02 |
| 16 | <a href="#">Hepatitis C</a>                                 | 68 (1.4%)    | 178 (1.03%)  | 0.002364879  | 3.404170e-02 |
| 17 | <a href="#">Tight junction</a>                              | 150 (3.08%)  | 436 (2.53%)  | 0.002439795  | 3.404170e-02 |
| 18 | <a href="#">Prostate cancer</a>                             | 59 (1.21%)   | 151 (0.88%)  | 0.002445115  | 3.404170e-02 |
| 19 | <a href="#">Fructose and mannose metabolism</a>             | 29 (0.6%)    | 64 (0.37%)   | 0.002556393  | 3.404170e-02 |
| 20 | <a href="#">Regulation of actin cytoskeleton</a>            | 196 (4.03%)  | 586 (3.4%)   | 0.002669937  | 3.404170e-02 |

|    |                                                          |             |             |             |              |
|----|----------------------------------------------------------|-------------|-------------|-------------|--------------|
| 21 | <a href="#">Lipoic acid metabolism</a>                   | 10 (0.21%)  | 16 (0.09%)  | 0.00435793  | 5.291772e-02 |
| 22 | <a href="#">Endometrial cancer</a>                       | 35 (0.72%)  | 84 (0.49%)  | 0.005415399 | 5.685964e-02 |
| 23 | <a href="#">Colorectal cancer</a>                        | 35 (0.72%)  | 84 (0.49%)  | 0.005415399 | 5.685964e-02 |
| 24 | <a href="#">Proteasome</a>                               | 23 (0.47%)  | 50 (0.29%)  | 0.00545178  | 5.685964e-02 |
| 25 | <a href="#">Pancreatic cancer</a>                        | 41 (0.84%)  | 102 (0.59%) | 0.0058959   | 5.685964e-02 |
| 26 | <a href="#">Chronic myeloid leukemia</a>                 | 51 (1.05%)  | 132 (0.77%) | 0.005970184 | 5.685964e-02 |
| 27 | <a href="#">Glioma</a>                                   | 46 (0.95%)  | 117 (0.68%) | 0.006020432 | 5.685964e-02 |
| 28 | <a href="#">Glycerophospholipid metabolism</a>           | 51 (1.05%)  | 133 (0.77%) | 0.007076486 | 6.360416e-02 |
| 29 | <a href="#">Adherens junction</a>                        | 64 (1.32%)  | 173 (1%)    | 0.007233414 | 6.360416e-02 |
| 30 | <a href="#">Pyrimidine metabolism</a>                    | 54 (1.11%)  | 144 (0.83%) | 0.00951059  | 7.988206e-02 |
| 31 | <a href="#">Epstein-Barr virus infection</a>             | 105 (2.16%) | 305 (1.77%) | 0.009711152 | 7.988206e-02 |
| 32 | <a href="#">Dorso-ventral axis formation</a>             | 28 (0.58%)  | 67 (0.39%)  | 0.01150448  | 9.167632e-02 |
| 33 | <a href="#">Glycerolipid metabolism</a>                  | 36 (0.74%)  | 91 (0.53%)  | 0.01253363  | 9.685078e-02 |
| 34 | <a href="#">Renal cell carcinoma</a>                     | 41 (0.84%)  | 107 (0.62%) | 0.01480232  | 1.110174e-01 |
| 35 | <a href="#">ErbB signaling pathway</a>                   | 53 (1.09%)  | 145 (0.84%) | 0.01737806  | 1.266116e-01 |
| 36 | <a href="#">Butanoate metabolism</a>                     | 22 (0.45%)  | 53 (0.31%)  | 0.02545113  | 1.802788e-01 |
| 37 | <a href="#">Fatty acid biosynthesis</a>                  | 7 (0.14%)   | 12 (0.07%)  | 0.02768269  | 1.907861e-01 |
| 38 | <a href="#">Vasopressin-regulated water reabsorption</a> | 29 (0.6%)   | 75 (0.43%)  | 0.03204072  | 2.115289e-01 |

|    |                                                         |            |             |            |              |
|----|---------------------------------------------------------|------------|-------------|------------|--------------|
| 39 | <a href="#">Basal transcription factors</a>             | 26 (0.53%) | 66 (0.38%)  | 0.03235148 | 2.115289e-01 |
| 40 | <a href="#">Biosynthesis of unsaturated fatty acids</a> | 15 (0.31%) | 34 (0.2%)   | 0.0341744  | 2.160657e-01 |
| 41 | <a href="#">Long-term potentiation</a>                  | 44 (0.9%)  | 122 (0.71%) | 0.03533915 | 2.160657e-01 |
| 42 | <a href="#">mTOR signaling pathway</a>                  | 35 (0.72%) | 94 (0.54%)  | 0.03558729 | 2.160657e-01 |
| 43 | <a href="#">VEGF signaling pathway</a>                  | 49 (1.01%) | 138 (0.8%)  | 0.0364476  | 2.161427e-01 |
| 44 | <a href="#">RNA polymerase</a>                          | 19 (0.39%) | 46 (0.27%)  | 0.03821451 | 2.214705e-01 |

**Supplemental Table 6. Primer list**

| Name              | Sequence                                                             |
|-------------------|----------------------------------------------------------------------|
| GADD34            | +467 : TCCTCTGGCAATCCCCCATA<br>-570 : TGGTTTTTCAGCCCCAGTGTT          |
| ATF3              | +1347 : GCTGTCACCACGTGCAGTATCTCA<br>-1416 : TCTGTCCTCCTCTTGCTGACAAGC |
| BIP<br>(HspA6)    | +1696 : CTGGGTACATTTGATCTGACTGG<br>-1931 : TCCTTGAGCTTTTTGTCTTCCT    |
| HERP<br>(HERPUD1) | +787 : CTCCAGCCCCTATTCACAAC<br>-957 : TCCAATCCAACCAATCTCG            |
| EDEM              | +1678 : GAAATGAAAGGGGACAGAAG<br>-1945 : GCCAGCAAAGTGAAGAGAC          |
| CHOP<br>(DDIT3)   | +373 : CAGAACCAGCAGAGGTCACA<br>-571 : AGCTGTGCCACTTTCCTTTC           |
| ASNS              | +490 : ATCACTGTCGGGATGTACCC<br>-692 : CTTCAACAGAGTGGCAGCAA           |
| IGFBP             | +765 : TATGATGGCTCGAAGGCTCT<br>-988 : TAGACGCACCAGCAGAGTC            |
| CYP1A1            | +634 : CTCCATTGCCTCTGACCCAG<br>-943 : CAGGGAAGGGTTGGGTAGGT           |
| ATP6V0A1          | +1330: GAGAGATAAATCCAGCTCCGT<br>-1549 : GTGTACATGGAGAACACACC         |
| NDUFA1            | +141 : GATGTGGTTCGAGATTCTCC<br>-317 : CGATCAACTCCAGAGATGCG           |



---

|           |                              |
|-----------|------------------------------|
| SDHD      | +79 : AACGAGATGGCGGTTCTCTG   |
|           | -267 : CTTGTCCAAGGCCCAATGGT  |
| COX6C     | +401 : AACTACCATGGCTCCCGAAG  |
|           | -618 : AGATACCAGCCTTCCTCATC  |
| GRP94     | +766 : TTGGTGTTCGGTTTCTATTCC |
| (HSP90B1) | -843 : GCTGGGTATCGTTGTTGTG   |

---
